# Supplementary material for: Nervous system-wide analysis of Hox regulation of terminal neuronal fate specification in Caenorhabditis elegans
Source: PLoS Genet. 2022 Feb 28;18(2):e1010092. doi: 10.1371/journal.pgen.1010092 (PMC8912897; doi:10.1371/journal.pgen.1010092)
Supplement: S2 Table — Expression values were extracted from https://cello.shinyapps.io/celegans/ based on the scRNA-seq data from Packer et al., 2019 [1]. Only the neurons with adjusted.tpm.estimate > 0 were shown. Red indicates the expression were confirmed by our analysis using the fluorescent reporters. (XLSX) [file pgen.1010092.s002.xlsx]

## Sheet: Sheet1
S2 Table. Hox expression in embryonic neurons found by the scRNA-seq of the embryos.
ceh-13
cell.bin	raw.tpm.estimate	adjusted.tpm.estimate	bootstrap.median.tpm	ci.95p.lb	ci.80p.lb	ci.80p.ub	ci.95p.ub
ADE:390_510	298.4	330.8	288.8	160.6	199.6	388.3	432.6
ASH:390_510	29.1	11.1	28.2	0	0	66.3	87.4
ASK:510_650	33.5	16.9	31.9	0	2.2	65.6	87.5
AVA:390_510	19.4	5.2	19	0	0	47.9	62.9
AVH:330_390	98.8	57.4	97.8	0	0	183.1	245.9
AVH:510_650	101.9	54.8	98.6	0	0	203.4	269.2
AVK:390_510	38.9	26.9	34.9	0	7.5	71.2	93.1
AVK:510_650	41.2	19.3	40	0	2.9	79.5	104.6
AWB:390_510	18.9	1.5	18.7	0	0	46.3	64.1
AWC:510_650	20.9	2.3	20.4	0	0	50.7	70
DA:330_390	143.1	129.6	139.6	74.3	91.5	191.9	221.7
DA:390_450	182.2	180.9	180.7	101	123.6	241.8	276
DA:450_510	133.9	131.9	131.6	55.6	81.3	185.1	217.2
DA_DB:510_580	71.7	67.1	68.2	20.5	33.7	107.5	130.1
DA_DB:580_650	140.8	141.4	136.6	50.3	76.1	205.6	252.7
DB:330_390	178.8	173.2	175	106	127.4	225.9	256.1
DB:390_450	124.2	113.9	120.2	43.4	68.6	186.1	215.8
DB:450_510	200.9	142.2	189	42.4	79.7	325.9	406.2
DD:330_390	513.5	526.1	508	381.7	428.5	598.1	640.6
DD:390_510	558	549.1	540.2	293	366.4	741.2	865.1
DD:510_650	719.8	861.7	697.9	384.3	484.4	938.1	1080.4
I5:330_390	108.2	82.3	103.3	0	22.7	193.6	254.5
IL2:330_390	62.2	36.3	58.7	0	13.7	122.5	156.5
IL2:510_650	16.8	0.3	16.5	0	0	45.6	66.3
OLQ:390_510	22	2.9	21	0	0	55.3	75
OLQ:510_650	10.3	3.7	9.9	0	0	25.2	37.2
PVP:390_510	81	47.4	80	0	0	170.8	219.6
PVP:510_650	59.3	14	58.3	0	0	130.7	182.8
PVT:gt_650	99.7	36.7	97.6	0	0	202.6	271.8
RIA:390_510	25.2	9.2	24.8	0	0	56.2	76.5
RIA:510_650	43.8	24	43.3	0	4.3	90.7	118.7
RIM:390_510	11.9	1.4	11.7	0	0	33	43.9
RIV:330_390	481.1	522.6	480.6	295.9	362.1	617.8	703.2
RIV:390_510	30.4	18	29.9	0	5.3	61.7	85.5
RME:390_510	20.6	0.6	20.2	0	0	50.9	71.2
SIA:390_510	20.6	5.7	20.3	0	0	50.6	66.8
SMB:330_390	92.4	80.2	91.3	10.4	37.3	155.1	197.9
SMD:390_510	22.7	7.5	22.3	0	0	54.3	70.4
URB_and_possibly_URA:330_390	60.1	28.5	59.4	0	0	128.1	173.4
lin-39
AIY:510_650	44	23.2	42.7	0	7.3	88.1	115.1
AIY:gt_650	62.7	23.1	61.1	0	0	130.4	180.1
AUA:390_510	27.7	8.8	22.5	0	0	53.9	72.5
AVG:390_510	58.6	17.7	57.5	0	0	123.8	170.2
AWA:gt_650	122.5	80.9	117.8	0	0	241.6	319
CEP:390_510	13.8	2	13.1	0	0	33.3	47
DA:330_390	1528	1615.7	1520.6	1186.5	1291.6	1735.1	1866.4
DA:390_450	755.4	800.4	757.1	524.2	610.1	909.7	999.7
DA:450_510	677.8	735.7	671.9	499	555.6	805.8	878.4
DA_DB:510_580	422.8	458.5	417.3	278	322.9	522.6	576.9
DA_DB:580_650	328	355	318	168.2	224.6	422.5	476.7
DA_DB:gt_650	294.7	341.3	282.2	44.3	122	482	598.2
DB:330_390	558.3	582.4	554.1	432.9	473.4	640.4	691.9
DB:390_450	408.2	428.5	397.6	218.8	278.9	531.4	605.7
DB:450_510	699.8	761.2	683.5	431.8	492.7	887	1013.9
DD:330_390	873.3	902.5	869.4	663.5	726.3	1019.5	1095.6
DD:390_510	400.8	429.1	394.5	229.7	284.8	507.6	563.7
DD:510_650	721.8	815.3	688.3	311.2	449.5	1001.8	1169.2
IL1:390_510	15.9	2.9	15.4	0	0	37.8	53.6
RIB:510_650	36.1	17.4	35.4	0	0	81.4	105.8
RIV:330_390	87.2	63.5	84.2	8	29.4	153.6	181.5
RIV:390_510	54.9	40	52.2	2	17.5	90	121.1
RMD:510_650	41.5	15.4	41.1	0	0	91.6	128.9
RME:510_650	32.3	3.5	31.7	0	0	72.7	102.5
mab-5
ADF:390_510	24.5	7.8	24.3	0	0	52.6	77
AIN:390_510	116	75.4	113.3	0	0	237.1	312.8
ASE:390_510	53.7	42.3	53.2	9.9	22.9	88.5	107.7
ASH:390_510	17.4	7.2	17.2	0	0	35.8	49.1
AVA:330_390	18.4	1.4	18.2	0	0	39.9	56.9
AVA:gt_650	165.3	109	157.3	0	0	320.1	434.7
AVK:390_510	10	2.5	9.8	0	0	24.3	32.2
CAN:330_390	37.6	21.9	32.7	0	6.9	72.8	93.8
DA:330_390	562.9	579.5	556.7	388.3	444	674.6	742.9
DA:390_450	211.4	213.1	208	118.4	146.6	283.4	320.6
DA:450_510	277.9	279	275.5	162.6	200.3	356.4	403.8
DA_DB:510_580	187.9	176.8	185.8	76.1	114.5	265	320
DA_DB:580_650	142.8	130.4	136.7	51.8	76.3	208.4	254.5
DA_DB:gt_650	248	267.6	237.5	15.5	83.7	406.5	492.4
DB:330_390	611.5	632.6	606.7	451.1	499.9	722.3	794.2
DB:390_450	310.2	326.6	307	168	217.9	406.2	462
DB:450_510	156.5	155.8	148.4	55.4	85.8	226.5	281
DD:330_390	534.9	538.2	522.8	383.1	424.4	637.4	702.7
DD:390_510	203.7	197.1	198	100.5	126.9	282.2	330.6
DVA:330_390	518.2	637.9	513.9	305.9	373.5	680	771
DVA:390_510	146.5	115.9	143.2	0	0	289.9	371.8
DVA:510_650	254.3	240.3	244.4	0	75.2	450.7	566.9
IL1:390_510	30.1	14	29.6	0	0	65	84.5
PVT:510_650	519	485.1	462.4	109.7	187.8	812.3	997.7
PVT:gt_650	188.7	143.1	174.7	0	45.6	333.3	446.8
RIB:510_650	57.3	26.5	55.9	0	0	115.8	152.4
SIB:390_510	15	4.4	14.7	0	0	33.8	45
URX:390_510	28.5	8.8	28.2	0	0	60.5	82.3
egl-5
ADL:330_390	8.9	3.3	8.8	0	0	18.1	24
ALM_PLM:gt_650	38	20.9	37.4	0	0	76.6	97.1
DA:450_510	28	19.8	27.2	0	8.3	48.8	65.5
DB:330_390	23.1	14.9	21.2	1	6.7	39.8	51.8
DD:330_390	13.1	3.5	11.1	0	0	26.9	35.3
PHB_and_possibly_PHA:390_510	154.9	165.7	149.5	63.8	91	217.4	253.5
PHB_and_possibly_PHA:510_650	448.3	478.9	410.5	43.1	146.8	699.9	889.3
nob-1
ADL:330_390	18.5	3.8	18.3	0	0	41	55.9
ADL:510_650	18	11	17.5	0	1.7	35.1	44.4
ASE:390_510	8.9	1.3	8.5	0	0	22.6	30.8
ASG:510_650	22.8	6.5	22.3	0	0	53.3	70.6
ASH:330_390	16.8	9.7	15.4	0	2.9	32.1	40.7
ASH:390_510	8.2	1.2	7.7	0	0	21.7	28.9
AVD:390_510	133.3	98	119.6	0	42.3	239.2	296.7
AWC:390_510	13.4	4.5	13.3	0	0	30.9	40.5
BAG:510_650	33.1	22.8	30.5	0	8.2	60.6	83.3
CAN:390_510	14.2	7.1	14	0	1.6	30.5	39.8
CAN:510_650	61.1	26.6	58	0	8.4	115.5	152.3
CEP:390_510	10.8	2.6	10.6	0	0	26.6	34
DA:390_450	12.2	3.6	12	0	0	29.2	38.3
DA:450_510	22.9	4.7	22.7	0	0	51.2	70.2
DA_DB:580_650	33.4	14.9	33	0	0	70.5	90.7
DB:330_390	9.8	4	7.5	0	0.2	19.6	29.5
DD:330_390	12.8	4.8	12.6	0	0.4	25.6	36.6
DVA:330_390	449.5	475.9	432	158.9	247.7	643.5	793.2
DVA:390_510	1608.5	2036.9	1563.2	761.8	1001.4	2156.4	2493.9
DVA:510_650	530.2	710.2	515.9	207.4	301.9	748.2	886.8
DVA:gt_650	414.9	495.2	383.9	119.6	196	619.9	749.8
DVC:330_390	704.8	883.9	701.8	416.3	515.1	882.5	982.2
DVC:390_510	790.3	921.7	764.2	405.3	511.8	1064	1235.2
DVC:510_650	547	708.3	537.9	290.2	372.5	714.6	814.4
PHB_and_possibly_PHA:390_510	20.3	4	20.1	0	0	44.1	65
PVR:330_390	558.4	749.8	548.9	229	321.1	773.1	868.4
RIA:390_510	31.6	16.9	31.3	0	0	67.2	85.6
RMD:390_510	30.1	11.4	29.9	0	0	64.3	79.8
RMD:510_650	28.9	16.3	25.2	0	0.8	57.3	74.8
php-3
ADF_AWB_terminal_cells_but_undifferentiated	16.5	7.2	16.4	0	0	34.5	44.7
ASG:510_650	30.2	13.6	29.8	0	0	62.6	80.9
ASJ:gt_650	32.7	9.6	31.6	0	0	71	93
AWB:510_650	28.2	7	27.2	0	0	58.2	88.2
CAN:510_650	33.9	14	33.4	0	0	69.6	94.3
DD:330_390	15.7	4.9	13.8	0	0.1	33.1	44.7
DVA:330_390	146.8	75.4	143.7	15.5	35.7	273.2	346.3
DVA:390_510	253.8	268.5	247	0	79.9	427.2	566.2
DVA:510_650	147	118.7	143.1	0	0	294.9	380.4
DVA:gt_650	124.7	70.8	103.2	0	18.4	235.6	325.5
DVC:330_390	230.5	173.1	226.3	0	64	416.1	527
DVC:390_510	100.3	54.2	97.7	0	0	199.9	262.8
IL2:390_510	12.8	4.9	12.7	0	0	27.5	35.9
PVR:330_390	239.6	176	234.3	0	0	455.7	580.5
RMD:510_650	15.7	2.9	15.5	0	0	34.2	47.9
Reference
1. Packer JS, Zhu Q, Huynh C, Sivaramakrishnan P, Preston E, Dueck H, et al. A lineage-resolved molecular atlas of C. elegans embryogenesis at single-cell resolution. Science. 2019;365(6459). Epub 2019/09/07. doi: 10.1126/science.aax1971. PubMed PMID: 31488706
